# Supplementary material for: Cyclodextrin-Based Magnetic Nanoparticles for Cancer Therapy
Source: PubMed Central journal article supplement (PMC5869661; doi:10.3390/nano8030170), 2018-03-16
Supplement: nanomaterials-08-00170-s001.pdf [file nanomaterials-08-00170-s001.pdf]

Article

# Cyclodextrin-Based Magnetic Nanoparticles for Cancer Therapy

Radosław Mrówczyński <sup>1,\*</sup>, Artur Jędrzak <sup>1,2</sup>, Kosma Szutkowski <sup>1,\*</sup>, Bartosz F. Grześkowiak <sup>1</sup>, Emerson Coy <sup>1</sup>, Roksana Markiewicz <sup>1</sup>, Teofil Jesionowski <sup>2</sup> and Stefan Jurga <sup>1</sup>

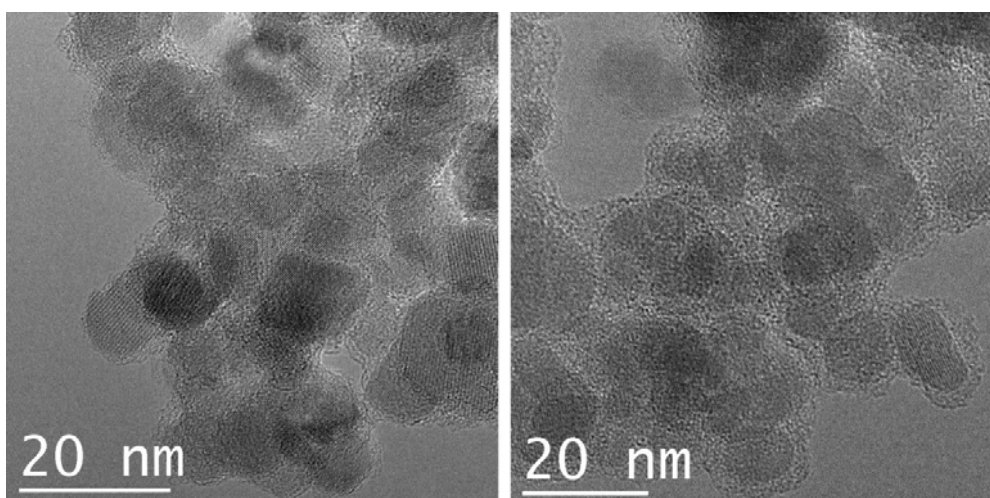

Figure S1. HR-TEM pictures of nanomaterial B with visible crystalline lattice.

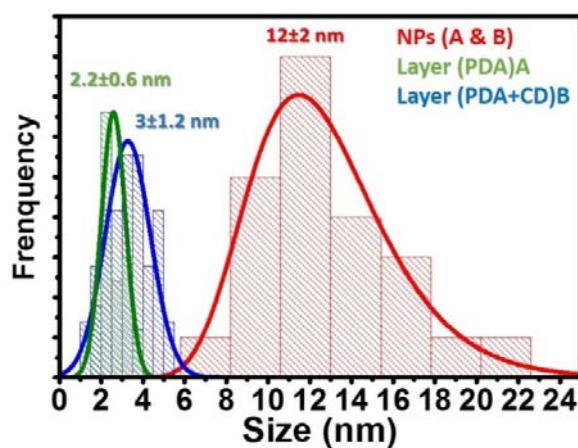

Figure S2. PDA layer thickness distribution in sample A (Green color) and B (Blue color) and size distribution of magnetic core in both samples (Red color). Individual particles were measured using DigitalMicrograph software from HR-TEM images. A collection of 200 individual measurements was collected and presented in histogram form.

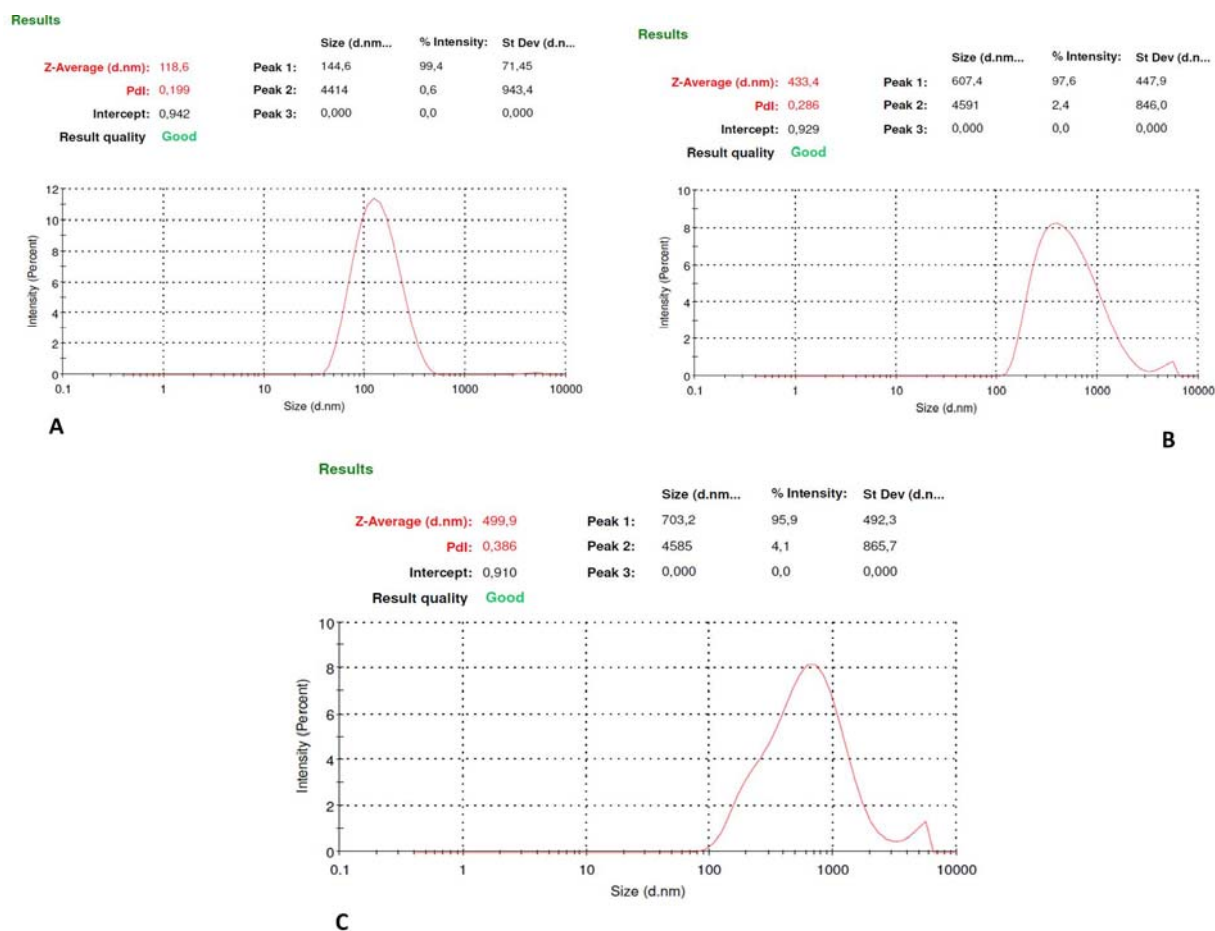

**Figure S3.** Hydrodynamic diameter recorder for bare magnetite nanoparticles (A); Fe<sub>3</sub>O<sub>4</sub>@PDA (B) and Fe<sub>3</sub>O<sub>4</sub>@PDA@SH-βCD (C).

**Table S1.** Changes of hydrodynamic diameter in time recorder for Fe<sub>3</sub>O<sub>4</sub>@PDA@SH-βCD

| Day | Hydrodynamic diameter (nm) |
|-----|----------------------------|
| 0   | 500                        |
| 3   | 683                        |
| 6   | 684                        |
| 7   | 684                        |

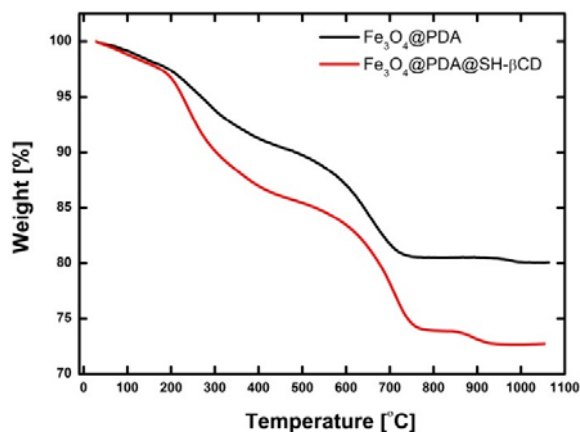

Figure S4. TGA curves for  $\text{Fe}_3\text{O}_4@PDA$  and  $\text{Fe}_3\text{O}_4@PDA@SH-\beta CD$ .

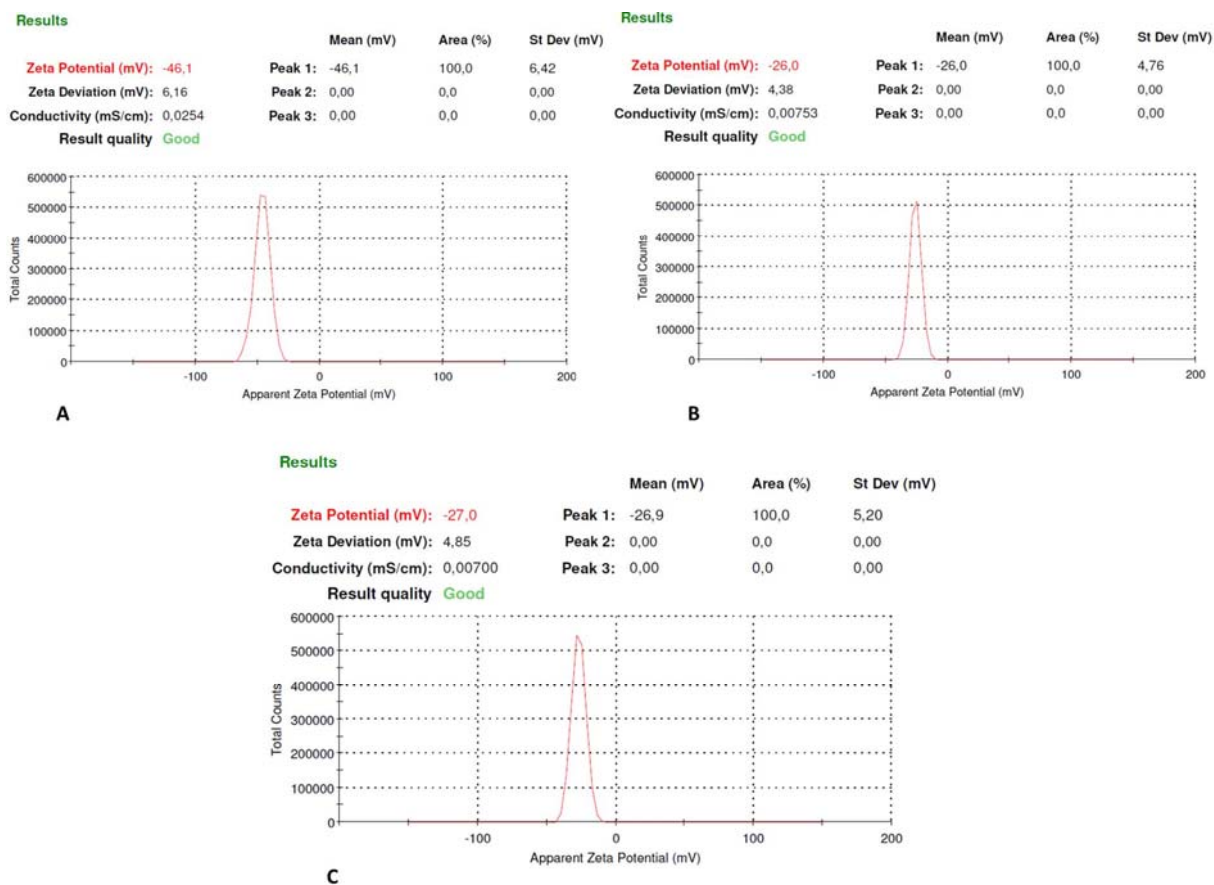

Figure S5. Zeta potential values recorder for bare magnetite nanoparticles (A);  $\text{Fe}_3\text{O}_4@PDA$  (B) and  $\text{Fe}_3\text{O}_4@PDA@SH-\beta CD$  (C).

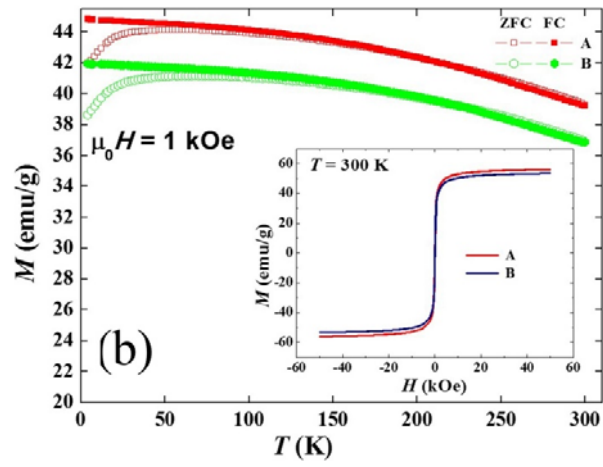

Figure S6. Magnetic properties of sample A and B.

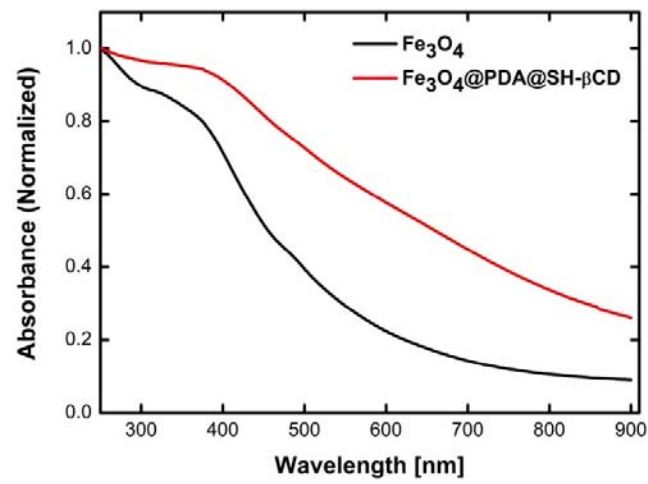

Figure S7. Absorption spectra of magnetic nanoparticles and nanomaterial B in range from 250 to 900 nm.

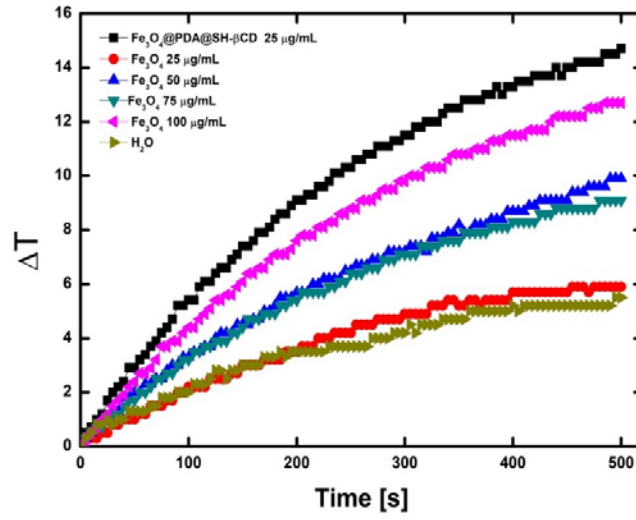

**Figure S8.** Temperature changes vs. time caused by bare magnetite at different concentration and nanomaterial B at concentration of 25  $\mu\text{g/mL}$ .

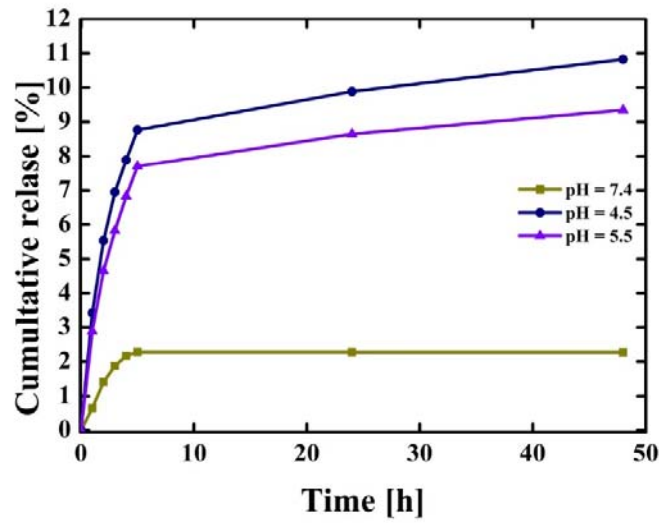

**Figure S9.** DOX release profile under various pH from sample B + DOX.

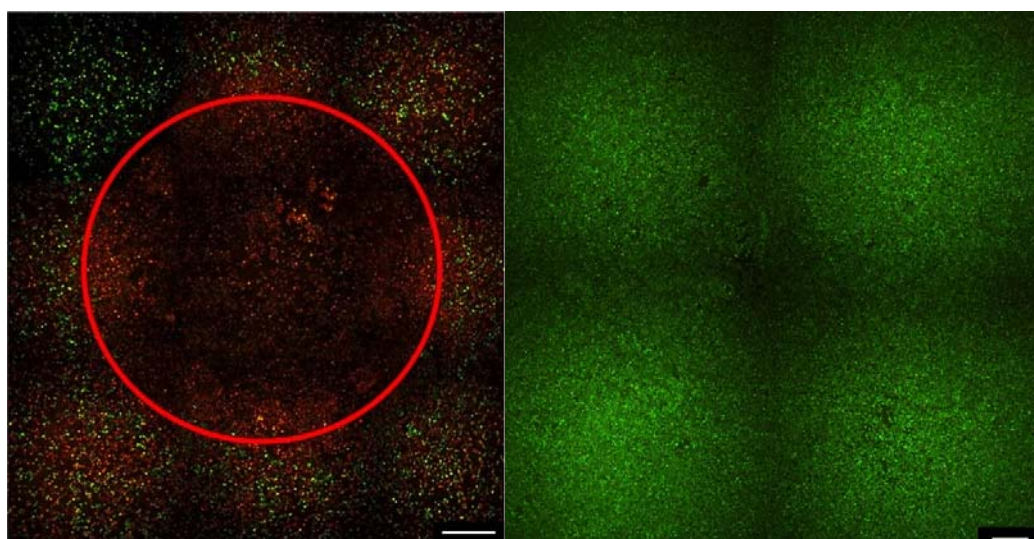

(a)

(b)

**Figure S10.** Figure (a) The results of LIVE/DEAD after irradiation of HepG2 cell priori incubated with nanomaterials B at concertation 40  $\mu\text{g}/\text{mL}$ . Red-death cell, Green-live cells; Figure (b) HepG2 cells irradiated with laser beam without nanomaterial B. Green-live cells. Scale bar 500  $\mu\text{m}$ .
